## Information about the journal

All communications should be addressed to the Editor,  
The Journal of Experimental Biology, Department of Zoology,  
Downing Street, Cambridge CB2 3EJ, England.

### Experiments on living animals

The Editorial Board will not allow the publication of papers describing experimental procedures which may reasonably be presumed to have inflicted unnecessary pain, discomfort, or disturbance of normal health on living animals. Manuscripts will only be accepted if:

- 1 it is clear that the advances made in physiological knowledge justified the procedures;
- 2 appropriate anaesthetic and surgical procedures were followed;
- 3 adequate steps were taken to ensure that animals did not suffer unnecessarily at any stage of the experiment.

Papers on vertebrates will be accepted only if the experiments comply with the legal requirements in the UK (see *Handbook for the Animal Licence Holder* – Institute of Biology; *Notes on the Law Relating to Experiments on Animals in Great Britain* – Research Defence Society; *UFAW Handbook on the Care and Management of Laboratory Animals*) or Federal Legislation and the National Institutes of Health Guidelines in the USA. Department of Health Education and Welfare Publication No. NIH 78-23 (1978).

### Subscriptions

*The Journal of Experimental Biology* (ISSN 0022-0949) is published as seven volumes a year in January, March, May, July, September, October and November. The subscription price of volumes 134–140 (1988) is £250.00 UK (USA and Canada US \$550.00, Japan £315.00, rest of the world £290.00) per annum, payable in advance; postage is included. There are reduced subscriptions for individual use (£50, \$85) and for members of certain societies (£35, \$75). Orders for 1988, which can be in £ Sterling/Dollars or Access/Visa credit cards, should be sent to The Biochemical Society Book Depot, PO Box 32, Commerce Way, Colchester CO2 8HP, UK or to your normal agent or bookseller. Copies of the journal for subscribers in the USA and Canada are sent by air to New Jersey to arrive with minimum delay. Second class postage paid at Rahway, NJ, and at additional mailing offices.

Postmaster, send address corrections to: The Journal of Experimental Biology, c/o Mercury Airfreight International Inc., 2323 Randolph Avenue, Avenel, New Jersey 07001, USA (US Mailing Agent).

**Claims** for missing parts can only be considered if made immediately upon receipt of the subsequent issue.

**Back volumes.** Please contact The Biochemical Society Book Depot (see above) for prices.

**Index.** An annual index will appear in the last volume each year.

### Copyright and reproduction

Authors may make copies of their own papers in this journal without seeking permission from The Company of Biologists Limited, *provided that such copies are for free distribution only: they must not be sold.*

Authors may re-use their own illustrations in other publications appearing under their own name, without seeking permission.

Specific permission will *not* be required for photocopying copyright material in the following circumstances.

- 1 For private study, provided the copying is done by the person requiring its use, or by an employee of the institution to which he/she belongs, without charge beyond the actual cost of copying.
- 2 For the production of multiple copies of such material, to be used for *bona fide* educational purposes, provided this is done by a member of the staff of the university, school or other comparable institution, for distribution without profit to student members of that institution provided the copy is made from the original journal.

For all other matters relating to the reproduction of copyright material written application must be made to Dr R. J. Skaer, Company Secretary, The Company of Biologists Limited, Department of Zoology, Downing Street, Cambridge CB2 3EJ, UK.

ISI Tear Service, 3501 Market Street, Philadelphia, Pennsylvania 19104, USA is authorized to supply single copies of separate articles for private use only.

## Information for contributors

### Style

Papers should be as concise as possible, be written in English (spelling as in Oxford English Dictionary), and use SI units.

### Submissions

Please enclose two copies of the text, one set of original illustrations and two sets of copy figures.

### Text (including tables, references and figure legends)

The text must be typewritten, in double-spacing, with numbered pages. The position of the figures and tables should be indicated in the margin. The *title page* must include the address(es) where the work was carried out, a *page heading* of up to 40 characters, and three or more *key words*. Where applicable, the present address and address for correspondence should also be given. A *Summary* must be the first section of the ms, stating as briefly as possible (typically 150–200 words) the results and conclusions of the work. Each *table* must be on a separate page. *Figure legends* must be in a single series at the end of the ms. *References* must be listed alphabetically. The titles of journals should be abbreviated according to the *World List of Scientific Periodicals*, 4th edn (1963), and should be presented as follows:

BRINES, M. L. & GOULD, J. L. (1982). Skylight polarization patterns and animal orientation. *J. exp. Biol.* **96**, 69–91.

MAZIA, D. (1961). Mitosis and physiology of cell division. In *The Cell*, vol. 3 (ed. J. Brachet & A. E. Mirsky), pp. 77–412. New York, London: Academic Press.

Citations in the text are given in the following form: Jones & Smith (1960) or (Jones & Smith, 1960). Where there are more than two authors citations should be in the form (Jones *et al.* 1960). Where more than one paper by the same author(s) has been published in the same year they are cited as Jones (1960a), Jones (1960b) etc.

### Illustrations

All line drawings and photographs should be *unlabelled*, with the author's name and the number of the figure written on the back. The figures should be numbered in the order in which they are to appear in the text. Authors should also submit two full sets of clearly labelled copies of illustrations.

**Line drawings** must be *no more than twice final size*. Maximum final size is 200×130 mm. Oscillographs should be made suitable for reproduction in the form of well-defined line drawings and should have a white background.

*Do* submit original line drawings on heavy white paper or as well-defined photographic copies.

*Do not* submit originals in the form of computer printouts, photocopies or drawings on tracing or graph paper.

*Do not* use fine stippling or shading.

**Photographs** should be at *final size*. Maximum final size is 200×130 mm for a single plate. Photographs should be glossy bromide prints with good definition. They should be gummed on to white card and grouped as they are to appear. *Numbering and lettering* will be inserted by the printers and should be indicated on a tracing paper overlay. Magnification should be indicated, when relevant, by a scale line drawn on the overlay or beside the illustration. Colour plates can be reproduced free of charge at the Editor's discretion.

### Short communications

Must be original contributions to the literature and not preliminary reports. Methodological papers will only be accepted as *Short Communications*. All above instructions apply except that the communications must not exceed *four published pages* in length (including illustrations), no *Summary* is required, and line drawings must be at final size.

### Proofsheets and offprints

Authors will receive one set of slip proofs for correction and return to the Editor. Authors will receive 200 complimentary copies of their papers: additional copies may be purchased at modest cost, and should be ordered when the proofs are returned to the Editor.

## Word-processor disks

If your manuscript was prepared on a *word processor* there is a high probability that we can use the floppy disk for typesetting. This gives us a substantial decrease in typesetting time and assures you that there are no re-keying errors in your article. Using word-processor disks helps us to shorten publication times. *Disks need not be sent when the manuscript is first submitted.* Disks are not needed for Short Communications.

If you use a word processor and would be willing to lend us the disk, please give whoever is preparing your manuscript the following instructions, so that we can make the best use of your disk.

- 1 Follow the general instructions about style given in the *Information for Contributors* in the Journal.
  - 2 When you create and/or edit your manuscript, please use the document mode (or equivalent) in the word-processor program.
  - 3 Where possible, please.
    - Do not** split the article into small files on the disk; if possible keep all of the article in **one** file.
    - Do not** put more than one article in a file: it is difficult to separate the articles.
    - Do not** give the file a name which is longer than 8 characters.
    - Do not** justify the right-hand margin; this often produces 'discretionary' or 'soft' hyphens, which are not required.
    - Do not** use footnotes.
    - Do** use paragraph indents.
    - If possible** use your word-processor facilities: underlining, bold, superscripts and subscripts where required.
    - If possible** distinguish the numerals zero and one from the letters O and I.
    - Do** leave a blank line **before and after** all headings.
    - Do** type main headings in capital letters (e.g. RESULTS).
    - Do** type subheadings with underlining (e.g. underline).
  - 4 If your word processor or printer has any special characters, e.g.  
 $\bar{a} \bar{u} \grave{a} \acute{e} \emptyset \grave{a} \text{œ} \varsigma \beta \mu \sqrt{\pm} ^\circ \text{C} \times \alpha \delta \Delta$   
please use them consistently throughout the text. Please make a list of such special characters used and how you obtain them (i.e. dedicated key pressed or printer control codes used directly), and send this to us with the disk.
  - 5 If you have customized or installed your word processor using non-standard control codes, please indicate on the disk and, if possible, list any changes you have made. Alternatively, if you cannot supply a standard version of the word processor, please supply a 'text only'/ASCII file.
  - 6 Please ensure that the disk sent to us is the *final corrected version of the article that exactly matches the final manuscript*.
  - 7 Send us two complete final corrected versions of the manuscript, as well as the disk. NB: send only the disk containing the manuscript, not the word-processor program.
  - 8 Label the disk with: (a) your name; (b) the word processor/computer used, e.g. Osborne 1; (c) the printer used, e.g. Laserwriter; (d) the name of the program, e.g. Wordstar.
- The disk will be returned to you.
